# Supplementary material
Source: Research Square preprint supplement (doi:10.21203/rs.3.rs-9986911/v1)
Supplement: Supplementary file 1 [file 2c559dea62447a802a2b55b4.docx]

**Supplementary Material 1**

**Semi-Structured Interview Protocol**

**Title of the Study**

**Teachers’ Perspectives on the Post-School Transition of Individuals with Autism Spectrum Disorder**

**Demographic Information**

1. Age
2. Gender
3. Educational Level
4. Professional Background
5. Years of Professional Experience
6. Previous Training Related to ASD or Special Education

**Interview Questions**

**Q1**

What are the main challenges that individuals with Autism Spectrum Disorder (ASD) may encounter during their post-school lives?

**Q2**

To what extent do you think individuals with ASD are prepared for post-school life?

**Q3**

To what extent does the education provided in schools contribute to the employment opportunities and social lives of individuals with ASD?

**Q4**

What practices do you implement during the school process to develop independent living skills among individuals with ASD?

**Q5**

What role should families play in preparing individuals with ASD for post-school life?

**Q6**

How would you evaluate the level of societal acceptance and support for individuals with ASD?

**Q7**

What additional supports and services are needed to improve post-school outcomes for individuals with ASD?

**Q8**

As an educator or teacher, what types of training or resources do you need to provide more effective guidance to individuals with ASD during the post-school transition process?

**Q9**

What are your recommendations regarding school–community collaboration to improve the quality of life of individuals with ASD during the post-school transition process?

**Q10**

What policy changes, institutional arrangements, or program developments would you recommend to improve post-school transition outcomes for individuals with ASD?

**Closing Question**

Is there anything else you would like to add regarding the post-school transition experiences of individuals with Autism Spectrum Disorder?
